# Supplementary material
Source: HighWire-hosted journal article supplement (https://jech.bmj.com/content/jech-2015-206257)
Supplement: inline-supplementary-material-1 [file inline-supplementary-material-1.pdf]

## **Web Appendix**

Web Appendix 1: Descriptive statistics, 2004-2010

Web Appendix 2: Impact of public pension entitlement on unmet medical adjusting for private pensions (including voluntary and mandatory), 2004 and 2010.

Web Appendix 3: Impact of public pension entitlement on unmet medical need due to cost across the income distribution, ages 65 or over, 2004 and 2010.

Web Appendix 4: Impact of public pension entitlement on unmet medical need due to other reason, ages 65 and over, 2004 and 2010.

Web Appendix 5: Impact of public pension entitlement on unmet medical adjusting for the average production worker wage, 2004 and 2010.

Web Appendix 6: Impact of public pension entitlement on unmet medical adjusting for time dummies, 2004 and 2010.

Web Appendix 7: Impact of public pension entitlement on unmet medical adjusting for healthcare infrastructure, 2004 and 2010.

Web Appendix 8: Linear probability model of association between public pension entitlement and unmet medical need due to cost among older people (65+), 2004 and 2010, EU-SILC.

Web Appendix 9: Association between public pension entitlement and unmet medical need due to cost by income distribution, 2004-2010, EU-SILC

Web Appendix 1: Descriptive statistics, 2004-2010

| Variables                                             | Number of observations | Mean   | SD    | Mean annual change | Largest annual decline | Largest annual increase |
|-------------------------------------------------------|------------------------|--------|-------|--------------------|------------------------|-------------------------|
| Unmet medical need (65+)                              | 103                    | 2.43   | 2.84  | -0.06              | -3.3                   | 3.9                     |
| Public pension entitlement                            | 103                    | 12.83  | 1.60  | 0.11               | -0.4                   | 3.4                     |
| Sickness entitlement                                  | 103                    | 11.70  | 2.39  | -0.02              | -1.6                   | 0.6                     |
| Unemployment insurance entitlement                    | 103                    | 10.44  | 2.22  | -0.05              | -1.9                   | 0.7                     |
| Public health expenditure per capita (US\$100)        | 103                    | 21.06  | 5.24  | 0.69               | -1.86                  | 5.99                    |
| GDP per capita (US\$100)                              | 103                    | 302.19 | 57.90 | 4.23               | -29.84                 | 23.56                   |
| Proportion of older people with a chronic illness (%) | 103                    | 29.29  | 7.27  | 0.05               | -9.7                   | 12.2                    |
| Private pension expenditure (% GDP)                   | 103                    | 1.40   | 1.49  | 0.02               | -0.8                   | 1.9                     |

Notes: Sources: Comparative Welfare Entitlements database, OECD and Eurostat.

Web Appendix 2: Impact of public pension entitlement on unmet medical adjusting for private pensions (including voluntary and mandatory), 2004 and 2010.

| <b>Covariates</b>                                        | <b>Unmet medical need due to cost (percentage point) among over 65s</b> |                           |
|----------------------------------------------------------|-------------------------------------------------------------------------|---------------------------|
|                                                          | (1)                                                                     | (2)                       |
| Public pension entitlement                               | -1.11**<br>[-1.66,-0.55]                                                | -1.11**<br>[-1.67,-0.55]  |
| Sickness insurance entitlement                           | -0.35<br>[-1.59,0.88]                                                   | -0.35<br>[-1.60,0.91]     |
| Unemployment insurance entitlement                       | 0.15<br>[-0.41,0.72]                                                    | 0.16<br>[-0.39,0.71]      |
| US\$100 increase in public health expenditure per capita | 0.20<br>[-0.067,0.46]                                                   | 0.19<br>[-0.075,0.46]     |
| US\$100 increase in GDP per capita                       | -0.030<br>[-0.064,0.0039]                                               | -0.030<br>[-0.065,0.0054] |
| Proportion of older people with a chronic illness (%)    | -0.022<br>[-0.11,0.067]                                                 | -0.022<br>[-0.11,0.067]   |
| Private pensions (% of GDP)                              | —                                                                       | 0.035<br>[-0.77,0.84]     |
| Observations                                             | 103                                                                     | 103                       |
| $R^2$                                                    | 0.35                                                                    | 0.35                      |

*Notes:* Sources: Comparative Welfare Entitlements database, OECD, and Eurostat. Expenditure measures are adjusted for inflation and purchasing-power parity. All models adjust for country-specific differences that are constant over time. 95% confidence intervals in brackets.

\*  $p < 0.05$ , \*\*  $p < 0.01$

Web Appendix 3: Impact of public pension entitlement on unmet medical need due to cost across the income distribution, ages 65 or over, 2004 and 2010.

|                                                          | <b>Unmet medical need due to cost (percentage point) across income quintiles</b> |                            |                           |                            |                                     |
|----------------------------------------------------------|----------------------------------------------------------------------------------|----------------------------|---------------------------|----------------------------|-------------------------------------|
|                                                          | <b>First (poorest)<br/>quintile</b>                                              | <b>Second<br/>quintile</b> | <b>Third<br/>quintile</b> | <b>Fourth<br/>quintile</b> | <b>Fifth (richest)<br/>quintile</b> |
| <b>Covariates</b>                                        |                                                                                  |                            |                           |                            |                                     |
| Public pension entitlement                               | -1.65**<br>[-2.10,-1.19]                                                         | -1.22**<br>[-1.54,-0.91]   | -0.61**<br>[-0.81,-0.40]  | -0.60**<br>[-0.84,-0.36]   | 0.029<br>[-0.16,0.21]               |
| Sickness insurance entitlement                           | -0.53<br>[-1.96,0.89]                                                            | 0.077<br>[-3.04,3.19]      | 0.056<br>[-0.93,1.04]     | -2.46<br>[-6.65,1.72]      | 0.017<br>[-1.30,1.33]               |
| Unemployment insurance entitlement                       | 0.34<br>[-0.46,1.13]                                                             | 0.54<br>[-0.21,1.29]       | 0.36<br>[-0.11,0.83]      | 3.47<br>[-0.74,7.68]       | 0.11<br>[-1.11,1.33]                |
| US\$100 increase in public health expenditure per capita | 0.091<br>[-0.24,0.42]                                                            | 0.11<br>[-0.19,0.40]       | 0.18<br>[-0.100,0.45]     | -0.0060<br>[-0.21,0.20]    | 0.0069<br>[-0.071,0.085]            |
| US\$100 increase in GDP per capita                       | -0.029<br>[-0.066,0.0083]                                                        | -0.0026<br>[-0.043,0.038]  | -0.021<br>[-0.053,0.011]  | 0.029<br>[-0.023,0.081]    | -0.017<br>[-0.045,0.012]            |
| Proportion of older people with a chronic illness (%)    | 0.049<br>[-0.13,0.23]                                                            | -0.034<br>[-0.21,0.15]     | -0.024<br>[-0.092,0.044]  | -0.071<br>[-0.16,0.021]    | 0.000028<br>[-0.079,0.079]          |
| Observations                                             | 81                                                                               | 68                         | 67                        | 45                         | 38                                  |
| $R^2$                                                    | 0.39                                                                             | 0.30                       | 0.31                      | 0.36                       | 0.16                                |

Notes: Sources: Comparative Welfare Entitlements database and Eurostat. Expenditure measures are adjusted for inflation and purchasing-power parity. All models adjust for country-specific differences that are constant over time. 95% confidence intervals in brackets. Some countries do not report unmet medical need by income quintile are those countries that report it for the poorest quintile may not report it for the richest quintile. Hence the sample size is not consistent across the income distribution.

\*  $p < 0.05$ , \*\*  $p < 0.01$

Web Appendix 4: Impact of public pension entitlement on unmet medical need due to other reason, ages 65 and over, 2004 and 2010.

| Covariates                                               | Unmet medical need due to other reasons (percentage point)<br>over 65s |                       |                        |                              |
|----------------------------------------------------------|------------------------------------------------------------------------|-----------------------|------------------------|------------------------------|
|                                                          | (Model 1)                                                              | (Model 2)             | (Model 3)              | (Model 4)                    |
| Public pension entitlement                               | 0.079<br>[-0.23,0.39]                                                  | 0.036<br>[-0.25,0.33] | -0.070<br>[-0.30,0.16] | -0.060<br>[-0.26,0.14]       |
| Sickness insurance entitlement                           |                                                                        | 0.021<br>[-0.47,0.51] | 0.16<br>[-0.42,0.73]   | 0.37<br>[-0.26,1.01]         |
| Unemployment insurance entitlement                       |                                                                        | 0.34<br>[-0.21,0.90]  | 0.42<br>[-0.12,0.95]   | 0.38<br>[-0.086,0.86]        |
| US\$100 increase in public health expenditure per capita |                                                                        |                       | 0.078<br>[-0.012,0.17] | 0.17*<br>[0.036,0.30]        |
| US\$100 increase in GDP per capita                       |                                                                        |                       |                        | -0.020**<br>[-0.033,-0.0070] |
| Observations                                             | 103                                                                    | 103                   | 103                    | 103                          |
| $R^2$                                                    | 0.0043                                                                 | 0.081                 | 0.12                   | 0.24                         |

*Notes:* Sources: Comparative Welfare Entitlements database and Eurostat. Expenditure measures are adjusted for inflation and purchasing-power parity. All models adjust for country-specific differences that are constant over time. 95% confidence intervals in brackets.

\*  $p < 0.05$ , \*\*  $p < 0.01$

Web Appendix 5: Impact of public pension entitlement on unmet medical adjusting for the average production worker wage, 2004 and 2010.

|                                                          | Unmet medical need (percentage point) |                                |                            |                                                       |
|----------------------------------------------------------|---------------------------------------|--------------------------------|----------------------------|-------------------------------------------------------|
| <b>Covariates</b>                                        | <b>Whole population</b>               | <b>Poorest income quintile</b> | <b>Aged 65 or over</b>     | <b>Aged 65 or over in the poorest income quintile</b> |
| Public pension entitlement                               | -0.66*<br>[-1.19,-0.14]               | -1.26**<br>[-2.10,-0.42]       | -1.12**<br>[-1.77,-0.46]   | -1.58**<br>[-2.23,-0.94]                              |
| Sickness insurance entitlement                           | -0.29<br>[-1.28,0.70]                 | -0.30<br>[-1.46,0.85]          | -0.44<br>[-1.62,0.74]      | -0.34<br>[-1.06,0.38]                                 |
| Unemployment insurance entitlement                       | 0.19<br>[-0.33,0.71]                  | 0.54<br>[-0.25,1.34]           | 0.11<br>[-0.45,0.67]       | 0.68<br>[-0.43,1.79]                                  |
| US\$100 increase in public health expenditure per capita | 0.082<br>[-0.098,0.26]                | 0.044<br>[-0.14,0.23]          | 0.18<br>[-0.063,0.42]      | 0.088<br>[-0.21,0.39]                                 |
| US\$100 increase in GDP per capita                       | -0.023<br>[-0.058,0.012]              | -0.022<br>[-0.071,0.027]       | -0.029<br>[-0.063,0.0049]  | -0.033<br>[-0.084,0.018]                              |
| Increase in average production worker wage <sup>1</sup>  | 0.0093<br>[-0.0095,0.028]             | 0.021<br>[-0.011,0.053]        | -0.00079<br>[-0.018,0.017] | 0.037<br>[-0.046,0.12]                                |
| Observations                                             | 103                                   | 103                            | 103                        | 103                                                   |
| R <sup>2</sup>                                           | 0.0043                                | 0.081                          | 0.12                       | 0.24                                                  |

Notes: Sources: Comparative Welfare Entitlements database and Eurostat. Expenditure measures are adjusted for inflation and purchasing-power parity. All models adjust for country-specific differences that are constant over time. 95% confidence intervals in brackets.

1 – Each unit increase represents a 1000 unit in the local currency. The average production worker wage is a fictive worker in the manufacturing sector who is 40 years old, has been working for the 20 years preceding the loss of income or the benefit period.

\*  $p < 0.05$ , \*\*  $p < 0.01$

Web Appendix 6: Impact of public pension entitlement on unmet medical adjusting for time dummies, 2004 and 2010.

|                                                          | <b>Unmet medical need due to cost<br/>(percentage point) among over 65s</b> |
|----------------------------------------------------------|-----------------------------------------------------------------------------|
| <b>Covariates</b>                                        | (Model 1)                                                                   |
| Public pension entitlement                               | -0.97**<br>[-1.49,-0.46]                                                    |
| Sickness insurance entitlement                           | -0.39<br>[-1.60,0.83]                                                       |
| Unemployment insurance entitlement                       | 0.093<br>[-0.39,0.57]                                                       |
| US\$100 increase in public health expenditure per capita | 0.36*<br>[0.048,0.66]                                                       |
| US\$100 increase in GDP per capita                       | -0.047<br>[-0.10,0.010]                                                     |
| Proportion of older people with a chronic illness (%)    | -0.026<br>[-0.097,0.046]                                                    |
| Time dummies                                             | Y                                                                           |
| Observations                                             | 103                                                                         |
| $R^2$                                                    | 0.39                                                                        |

Notes: Sources: Comparative Welfare Entitlements database and Eurostat. Expenditure measures are adjusted for inflation and purchasing-power parity. All models adjust for country-specific differences that are constant over time and for time dummies (fixed-effects). 95% confidence intervals in brackets.

\*  $p < 0.05$ , \*\*  $p < 0.01$

Web Appendix 7: Impact of public pension entitlement on unmet medical adjusting for healthcare infrastructure, 2004 and 2010.

|                                                          | <b>Unmet medical need due to cost<br/>(percentage point) among over 65s</b> |
|----------------------------------------------------------|-----------------------------------------------------------------------------|
| <b>Covariates</b>                                        | (Model 1)                                                                   |
| Public pension entitlement                               | -1.14**<br>[-1.73,-0.55]                                                    |
| Sickness insurance entitlement                           | 0.068<br>[-1.87,2.01]                                                       |
| Unemployment insurance entitlement                       | 0.13<br>[-0.42,0.68]                                                        |
| US\$100 increase in public health expenditure per capita | 0.20<br>[-0.067,0.46]                                                       |
| US\$100 increase in GDP per capita                       | -0.037<br>[-0.079,0.0052]                                                   |
| Proportion of older people with a chronic illness (%)    | -0.027<br>[-0.12,0.068]                                                     |
| Hospital beds per 100,000 inhabitants                    | -0.0047<br>[-0.017,0.0073]                                                  |
| Observations                                             | 91                                                                          |
| $R^2$                                                    | 0.37                                                                        |

Notes: Sources: Comparative Welfare Entitlements database and Eurostat. Expenditure measures are adjusted for inflation and purchasing-power parity. All models adjust for country-specific differences that are constant over time and for time dummies (fixed-effects). 95% confidence intervals in brackets.

\*  $p < 0.05$ , \*\*  $p < 0.01$



Web Appendix 8: Linear probability model of association between public pension entitlement and unmet medical need due to cost among older people (65+), 2004 and 2010, EU-SILC.

| <b>Covariates</b>                                        | <b>Unmet medical need due to cost among over 65s</b> |
|----------------------------------------------------------|------------------------------------------------------|
| Pension entitlement                                      | -0.0057**<br>(0.00089)                               |
| Sickness insurance entitlement                           | -0.0021<br>(0.0023)                                  |
| Unemployment insurance entitlement                       | 0.00077<br>(0.0016)                                  |
| US\$100 increase in public health expenditure per capita | 0.0014<br>(0.0011)                                   |
| US\$100 increase in GDP per capita                       | -0.0026<br>(0.00018)                                 |
| Observations                                             | 312,095                                              |
| Countries                                                | 16                                                   |
| Years                                                    | 6                                                    |

*Notes:* Standard errors in parentheses. Model includes country and year fixed-effects capturing between country differences that are relatively stable over time and spatial correlation across countries in a given year, such as the recession. Model also adjusts for age, sex, marital status, and the presence of a chronic illness. Robust standard errors are clustered at the country-level.

\*  $p < 0.05$ , \*\*  $p < 0.01$

Web Appendix 9: Association between public pension entitlement and unmet medical need due to cost by income distribution, 2004-2010, EU-SILC

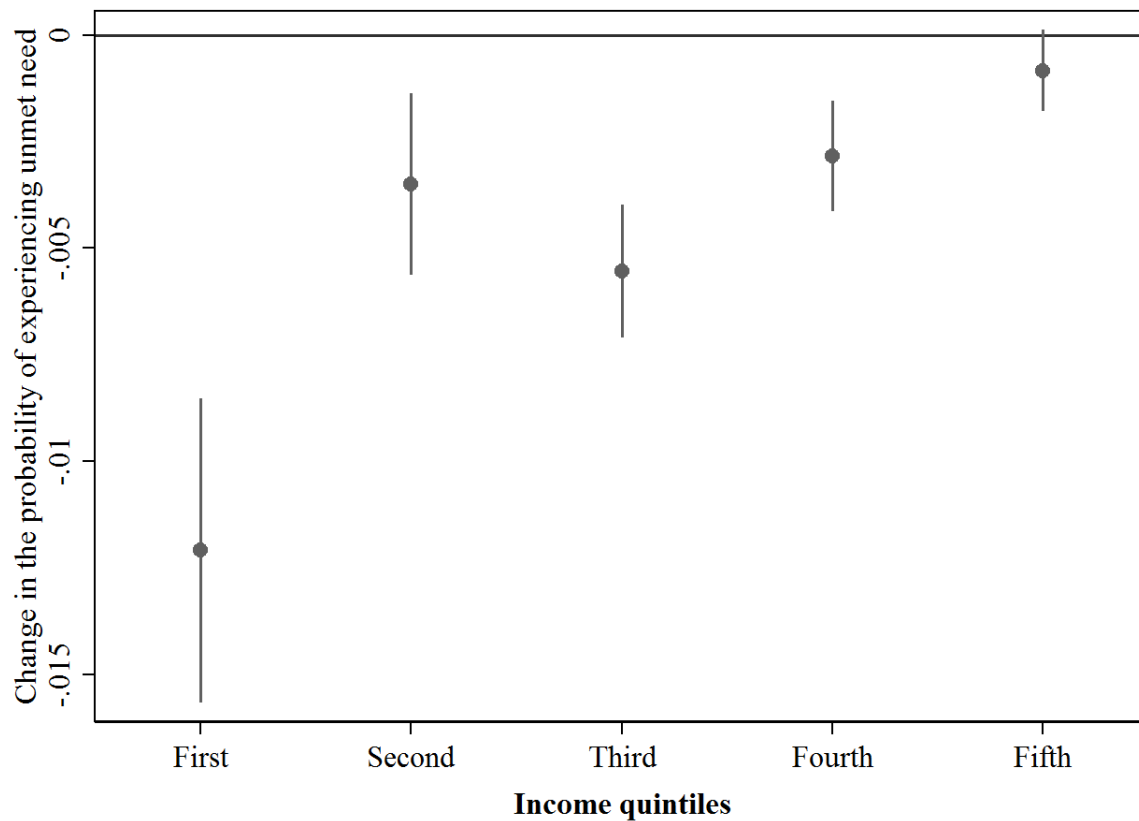

*Notes:* Sources: Comparative Welfare Entitlements database and Eurostat. All models adjust for sickness insurance entitlement, unemployment insurance entitlement, economic growth, government expenditure on health, age, sex, marital status, and the presence of a chronic illness. All models also adjust for country-specific differences that are constant over time and year fixed-effects. Vertical bars are 95% confidence intervals.
